# Supplementary material for: The Relationship between Ischemic Optic Neuropathy and Internal Carotid Artery Dissection: A Systematic Review
Source: MDPI journal article supplement (doi:10.3390/jcm13092486), 2024-04-24
Supplement: s1 [file s1]

**Table S1: Characteristics of studies included in the systematic review**

| First Author        | Country | Study Design | Total Sample Size (n.)                          | Age (years, mean $\pm$ SD or mean and range or mean age and 95% CI) | Study Time | Type of ION | Type of Dissection and occlusion site | Mean time between ION onset and first consultation | Follow-up Duration | Diagnostic investigation used for diagnosis | Stenosis severity |
|---------------------|---------|--------------|-------------------------------------------------|---------------------------------------------------------------------|------------|-------------|---------------------------------------|----------------------------------------------------|--------------------|---------------------------------------------|-------------------|
|                     |         |              | Number of Patients with ION (n. and %)          | Gender (n. and %)                                                   |            |             |                                       |                                                    |                    |                                             |                   |
|                     |         |              | Number of Patients of control groups (n. and %) | Involved Side                                                       |            |             |                                       |                                                    |                    |                                             |                   |
| Rivkin et al., 1990 | USA     | Case Report  | 1                                               | N/a                                                                 | N/a        | PION        | Spontaneous Dissection                | 24 hours                                           | N/a                | Angiography                                 | N/a               |
|                     |         |              | 1 (100%)                                        | Female                                                              |            |             |                                       |                                                    |                    |                                             |                   |
|                     |         |              | N/a                                             | Right                                                               |            |             | 2 cm above the carotid bifurcation    |                                                    |                    |                                             |                   |
| Tsai et al., 1997   | Taiwan  | Case-Report  | 1                                               | 55                                                                  | N/a        | PION        | Spontaneous Dissection                | 3 days                                             | 4 weeks            | Angiography                                 | N/a               |
|                     |         |              | 1 (100%)                                        | Male                                                                |            |             |                                       |                                                    |                    |                                             |                   |
|                     |         |              | N/a                                             | Right                                                               |            |             | 3 cm above the bifurcation            |                                                    |                    |                                             |                   |

| First Author         | Country | Study Design    | Total Sample Size (n.)                          | Age (years, mean $\pm$ SD or mean and range or mean age and 95% CI) | Study Time | Type of ION  | Type of Dissection and occlusion site                                      | Mean time between ION onset and first consultation | Follow-up Duration | Diagnostic investigation used for diagnosis | Stenosis severity |
|----------------------|---------|-----------------|-------------------------------------------------|---------------------------------------------------------------------|------------|--------------|----------------------------------------------------------------------------|----------------------------------------------------|--------------------|---------------------------------------------|-------------------|
|                      |         |                 | Number of Patients with ION (n. and %)          | Gender (n. and %)                                                   |            |              |                                                                            |                                                    |                    |                                             |                   |
|                      |         |                 | Number of Patients of control groups (n. and %) | Involved Side                                                       |            |              |                                                                            |                                                    |                    |                                             |                   |
| Biousee et al., 1998 | France  | Case Series     | Total: 110                                      | Patient 1: 33                                                       | 14 years   | AION<br>PION | Patient 1: Spontaneous Dissection                                          | N/a                                                | N/a                | Total Sample: 72 patients: Angiography      | Patient 1: 95%    |
|                      |         |                 | AION: 2 (1.8%)                                  | Patient 2: 41                                                       |            |              |                                                                            |                                                    |                    |                                             | Patient 2: 80%    |
|                      |         |                 | PION: 2 (1.8%)                                  | Patient 3: 51                                                       |            |              | Infrapetrous portion                                                       |                                                    |                    | 38: MRA                                     | Patient 3: 95%    |
|                      |         |                 |                                                 | Patient 4: 51                                                       |            |              | Patient 2: Spontaneous Dissection                                          |                                                    |                    | Patient 1: Angiography                      | Patient 4: 90%    |
|                      |         |                 |                                                 | Patient 1: female                                                   |            |              |                                                                            |                                                    |                    | Patient 2: Angiography                      |                   |
|                      |         |                 |                                                 | Patient 2: male                                                     |            |              |                                                                            |                                                    |                    | Patient 3: Angiography                      |                   |
|                      |         |                 |                                                 | Patient 3: female                                                   |            |              |                                                                            |                                                    |                    | Patient 4: Angiography                      |                   |
|                      |         |                 |                                                 | Patient 4: female                                                   |            |              |                                                                            |                                                    |                    |                                             |                   |
|                      |         |                 |                                                 | Patient 1: right                                                    |            |              | Cervical portion of the right ICA extending up to its supraclinoid segment |                                                    |                    |                                             |                   |
|                      |         |                 |                                                 | Patient 2: right                                                    |            |              |                                                                            |                                                    |                    |                                             |                   |
|                      |         |                 |                                                 | Patient 3: left                                                     |            |              |                                                                            |                                                    |                    |                                             |                   |
|                      |         |                 |                                                 | Patient 4: right                                                    |            |              |                                                                            |                                                    |                    |                                             |                   |
|                      |         |                 |                                                 |                                                                     |            |              | Patient 3: Spontaneous Dissection                                          |                                                    |                    |                                             |                   |
|                      |         |                 |                                                 |                                                                     |            |              | Cervical segment extending into the petrous portion of the left ICA        |                                                    |                    |                                             |                   |
|                      |         |                 |                                                 |                                                                     |            |              | Patient 4: Spontaneous Dissection                                          |                                                    |                    |                                             |                   |
|                      |         |                 |                                                 |                                                                     |            |              | Infrapetrous portion                                                       |                                                    |                    |                                             |                   |
| Biousee et al., 1998 | France  | Cross-Sectional | Total: 146                                      | Total: 45.5 (14 to 71)                                              | 25 years   | AION<br>PION | Traumatic and spontaneous Dissections                                      | N/a                                                | N/a                | Total Sample: 77 patients: Angiography      | 80-95%            |
|                      |         |                 | AION: 2 (1.25%)                                 | Female: 67 (45.9%)                                                  |            |              |                                                                            |                                                    |                    |                                             |                   |
|                      |         |                 | PION: 2 (1.25%)                                 | Male: 79 (54.1%)                                                    |            |              | N/a                                                                        |                                                    |                    | 69: MRA                                     |                   |
|                      |         |                 | N/a                                             | N/a                                                                 |            |              |                                                                            |                                                    |                    |                                             |                   |

| First Author         | Country   | Study Design    | Total Sample Size (n.)<br><br>Number of Patients with ION (n. and %)<br><br>Number of Patients of control groups (n. and %) | Age (years, mean $\pm$ SD or mean and range or mean age and 95% CI)<br><br>Gender (n. and %)<br><br>Involved Side | Study Time | Type of ION | Type of Dissection and occlusion site                    | Mean time between ION onset and first consultation | Follow-up Duration | Diagnostic investigation used for diagnosis                   | Stenosis severity                                                        |
|----------------------|-----------|-----------------|-----------------------------------------------------------------------------------------------------------------------------|-------------------------------------------------------------------------------------------------------------------|------------|-------------|----------------------------------------------------------|----------------------------------------------------|--------------------|---------------------------------------------------------------|--------------------------------------------------------------------------|
| Archer et al., 1998  | Australia | Case Report     | 1<br><br>1 (100%)<br><br>N/a                                                                                                | 52<br><br>Man<br><br>Left                                                                                         | N/a        | PION        | Spontaneous Dissection<br><br>2 cm below the skull base  | N/a                                                | 10 months          | CTA and MRA                                                   | 100%                                                                     |
| Kerty, 1998          | Norway    | Cross-Sectional | Total: 28<br><br>PION: 1 (3.5%)<br><br>N/a                                                                                  | Total: 37.8 (19–65)<br><br>Female: 10 (35.7%),<br>Male: 18 (63.1%)<br><br>N/a                                     | 5 years    | PION        | Spontaneous Dissection<br><br>N/a                        | N/a                                                | N/a                | Angiography: 5<br><br>MR; Doppler ultrasonography and MRA: 23 | N/a                                                                      |
| Babovic et al., 2005 | USA       | Case Report     | 1<br><br>1 (100%)<br><br>N/a                                                                                                | 43<br><br>Female<br><br>Right<br><br>(Bilateral CAD)                                                              | N/a        | AION        | Traumatic Dissection<br><br>N/a                          | Same day                                           | 3 months           | MRI and MRA                                                   | Bilateral internal carotid arteries, with 50% stenosis on the right side |
| Koch et al., 2005    | USA       | Case Report     | 1<br><br>1 (100%)<br><br>N/a                                                                                                | 53<br><br>Male<br><br>Right                                                                                       | N/a        | PION        | Spontaneous Dissection<br><br>N/a                        | 24 hours                                           | 3 months           | Angiography                                                   | N/a                                                                      |
| Kawabe et al., 2009  | Japan     | Case Report     | 1<br><br>1 (100%)<br><br>N/a                                                                                                | 73<br><br>Male<br><br>Left                                                                                        | N/a        | PION        | Spontaneous Dissection<br><br>1 cm above the bifurcation | N/a                                                | N/a                | Carotid artery Doppler and Angiography                        | 100%                                                                     |

| First Author                | Country     | Study Design | Total Sample Size (n.)<br><br>Number of Patients with ION (n. and %)<br><br>Number of Patients of control groups (n. and %) | Age (years, mean $\pm$ SD or mean and range or mean age and 95% CI)<br><br>Gender (n. and %)<br><br>Involved Side | Study Time | Type of ION                                  | Type of Dissection and occlusion site         | Mean time between ION onset and first consultation | Follow-up Duration | Diagnostic investigation used for diagnosis | Stenosis severity       |
|-----------------------------|-------------|--------------|-----------------------------------------------------------------------------------------------------------------------------|-------------------------------------------------------------------------------------------------------------------|------------|----------------------------------------------|-----------------------------------------------|----------------------------------------------------|--------------------|---------------------------------------------|-------------------------|
| Lysandropoulos et al., 2010 | Switzerland | Case Report  | 1<br>1 (100%)<br>N/a                                                                                                        | 27<br>Female<br>Right                                                                                             | N/a        | PION                                         | Spontaneous Dissection<br><br>N/a             | N/a                                                | 6 months           | Carotid artery Doppler and CTA              | Subocclusive dissection |
| Anders et al. 2014          | USA         | Case Report  | 1<br>1 (100%)<br>N/a                                                                                                        | 35<br>Male<br>Left                                                                                                | N/a        | PION                                         | Traumatic Dissection<br><br>Cavernous segment | Immediate                                          | N/a                | CTA                                         | 100%                    |
| Jah et al., 2019            | India       | Case Report  | 1<br>1 (100%)<br>N/a                                                                                                        | 55<br>Male<br>Right                                                                                               | N/a        | AION                                         | Spontaneous Dissection<br><br>N/a             | 1 month                                            | N/a                | Doppler ultrasonography                     | 100%                    |
| Zheng et al., 2020          | China       | Case-Report  | 1<br>1 (100%)<br>N/a                                                                                                        | 44<br>Female<br>Right                                                                                             | N/a        | AION/<br>PION<br>or a combination of thereof | Spontaneous Dissection<br><br>N/a             | N/a                                                | 5 months           | CTA and angiography                         | 90%                     |
| Lains et al., 2021          | USA         | Case-report  | 1<br>1 (100%)<br>N/a                                                                                                        | 64<br>Male<br>Right                                                                                               | N/a        | AION                                         | Spontaneous Dissection<br><br>N/a             | 4 days                                             | 18 months          | CTA                                         | 100%                    |

Abbreviations: ION: Ischemic Optic Neuropathy; PION: Posterior Ischemic Optic Neuropathy; AION: Anterior Ischemic Optic Neuropathy; Wks.: Weeks, N: number; SD: Standard Deviation; ICA: Internal carotid artery; MRA: Magnetic resonance angiography; CTA: Computed tomography angiography, CI: Confidence interval; N/A: Not applicable; CAD: Carotid artery dissection
