# Supplementary material for: The Relationship between Ischemic Optic Neuropathy and Internal Carotid Artery Dissection: A Systematic Review
Source: MDPI journal article supplement (doi:10.3390/jcm13092486), 2024-04-24
Supplement: s1 [file s1]

## Supplementary Material S1: Detailed Search Strategy

### **PUBMED:**

Free Text and MESH

**Query:** ("optic neuropathy, ischemic"[MeSH Terms] OR ("optic"[All Fields] AND "neuropathy"[All Fields] AND "ischemic"[All Fields]) OR "ischemic optic neuropathy"[All Fields] OR "naion"[All Fields] OR ("ions"[Supplementary Concept] OR "ions"[All Fields] OR "ion"[All Fields] OR "ions"[MeSH Terms]) OR ("mesons"[MeSH Terms] OR "mesons"[All Fields] OR "pion"[All Fields]) OR ("ions"[Supplementary Concept] OR "ions"[All Fields] OR "ion"[All Fields] OR "ions"[MeSH Terms]) OR ("optic nerve diseases"[MeSH Terms] OR ("optic"[All Fields] AND "nerve"[All Fields] AND "diseases"[All Fields]) OR "optic nerve diseases"[All Fields] OR ("optic"[All Fields] AND "neuropathy"[All Fields]) OR "optic neuropathy"[All Fields])) AND ("carotid arteries"[MeSH Terms] OR ("carotid"[All Fields] AND "arteries"[All Fields]) OR "carotid arteries"[All Fields] OR "carotid"[All Fields] OR "carotids"[All Fields] OR "carotidal"[All Fields] OR "carotide"[All Fields] OR "carotideal"[All Fields]) AND ("dissect"[All Fields] OR "dissected"[All Fields] OR "dissecting"[All Fields] OR "dissection"[MeSH Terms] OR "dissection"[All Fields] OR "dissections"[All Fields] OR "dissects"[All Fields]))

| # | Search Term                                                | No. Results |
|---|------------------------------------------------------------|-------------|
| 1 | "Carotid"                                                  | 157.975     |
| 2 | "optic neuropathy" OR "NAION" OR "ION" OR "PION" OR "AION" | 1.610.291   |
| 3 | "dissection"                                               | 233.878     |
| 4 | 1 AND 2 AND 3                                              | 82          |

### **EMBASE**

Free Text

Mapping options enabled:

- map to preferred term in Emtree
- search also as free text in all fields
- explode using narrower Emtree terms
- search as broadly as possible

| # | Search Term                                                                         | No. of Results |
|---|-------------------------------------------------------------------------------------|----------------|
| 1 | ((("Carotid" AND "optic neuropathy" OR "AION" OR "ION" OR "PION" AND "dissection")) | 60             |

### **SCOPUS**

Free Text

| # | Search Term                                                                                                                                                                              | No. of Results |
|---|------------------------------------------------------------------------------------------------------------------------------------------------------------------------------------------|----------------|
| 1 | ( TITLE-ABS-KEY ( carotid ) AND TITLE-ABS-KEY ( optic AND neuropathy ) OR OR TITLE-ABS-KEY ( ion ) OR TITLE-ABS-KEY ( pion ) OR TITLE-ABS-KEY ( ion ) AND TITLE-ABS-KEY ( dissection ) ) | 56             |
